# Supplementary material for: Altered function of the left ventricle and clinical significance of heart-type fatty acid-binding protein in cardiac dysfunction among patients with sepsis
Source: PubMed Central journal article supplement — Exp Ther Med. 2020 Sep 4;20(5):58. doi: 10.3892/etm.2020.9186 (PMC7485322; doi:10.3892/etm.2020.9186), 2020-09-04
Supplement: Supplementary_Data.pdf [file Supplementary_Data.pdf]

Figure SI. The correlation analysis of NT-proBNP, EF, E/A, cTnI and H-FABP.

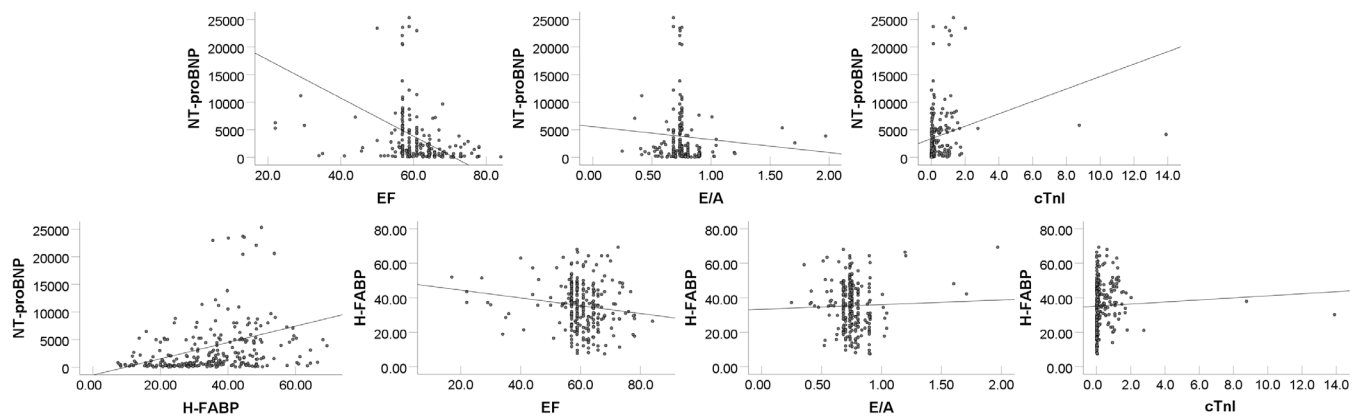

Table S1. Sequential (sepsis-associated) organ failure assessment score.

| System                                          | Score        |                   |                                                   |                                                            |                                                                      |
|-------------------------------------------------|--------------|-------------------|---------------------------------------------------|------------------------------------------------------------|----------------------------------------------------------------------|
|                                                 | 0            | 1                 | 2                                                 | 3                                                          | 4                                                                    |
| <b>Respiration</b>                              |              |                   |                                                   |                                                            |                                                                      |
| PaO <sub>2</sub> /FIO <sub>2</sub> , mmHg (kPa) | ≥400 (53.3)  | <400 (53.3)       | <300 (40)                                         | <200 (26.7) with respiratory support                       | <100 (13.3) with respiratory support                                 |
| <b>Coagulation</b>                              |              |                   |                                                   |                                                            |                                                                      |
| Platelets, x10 <sup>3</sup> /μl                 | ≥150         | <150              | <100                                              | <50                                                        | <20                                                                  |
| <b>Liver</b>                                    |              |                   |                                                   |                                                            |                                                                      |
| Bilirubin, mg/dl (μmol/l)                       | <1.2 (20)    | 1.2-1.9 (20-32)   | 2.0-5.9 (33-101)                                  | 6.0-11.9 (102-204)                                         | >12.0 (204)                                                          |
| <b>Cardiovascular</b>                           |              |                   |                                                   |                                                            |                                                                      |
|                                                 | MAP ≥70 mmHg | MAP <70 mmHg      | Dopamine <5 or dobutamine (any dose) <sup>a</sup> | Dopamine 5.1-15 or epinephrine ≤0.1 or norepinephrine ≤0.1 | Dopamine >15 or epinephrine >0.1 or norepinephrine >0.1 <sup>a</sup> |
| <b>Central nervous system</b>                   |              |                   |                                                   |                                                            |                                                                      |
| Glasgow Coma Scale score <sup>b</sup>           | 15           | 13-14             | 10-12                                             | 6-9                                                        | <6                                                                   |
| <b>Renal</b>                                    |              |                   |                                                   |                                                            |                                                                      |
| Creatinine, mg/dl (μmol/l)                      | <1.2 (110)   | 1.2-1.9 (110-170) | 2.0-3.4 (171-299)                                 | 3.5-4.9 (300-440)                                          | >5.0 (440)                                                           |
| Urine output, ml/day                            |              |                   |                                                   | <500                                                       | <200                                                                 |

<sup>a</sup>Catecholamine doses are given as μg/kg/min for at least 1 h. <sup>b</sup>Glasgow Coma Scale scores range from 3-15; higher score indicates better neurological function. FIO<sub>2</sub>, fraction of inspired oxygen; MAP, mean arterial pressure; PaO<sub>2</sub>, partial pressure of oxygen.
